# Supplementary material
Source: publisher figshare collection journal article supplement (https://sage.figshare.com/ndownloader/files/13869011)
Supplement: Supplementary file 1 [file 13869011]

Tables A–C

Factor loadings from exploratory factor analyses, extracting factors with eigenvalues > 1 and 5–6 factors (*N* = 284)

A. Extracting factors with eigenvalues > 1

| QODD item | Factor 1 | Factor 2 | Factor 3 | Factor 4 | Factor 5 | Factor 6 | Factor 7 | Factor 8 |
| --- | --- | --- | --- | --- | --- | --- | --- | --- |
| 3: Able to feed self | .72 |  |  |  |  |  |  |  |
| 4: Have control over bladder/bowels | .62 |  |  |  |  |  |  |  |
| 2: Have control over what was going on | .55 |  |  |  |  |  |  |  |
| 9: Have energy to do most things | .50 |  |  |  |  |  |  |  |
| 11: Keep dignity and self-respect | .48 |  |  |  |  |  |  |  |
| 1: Having pain under control | .45 |  |  |  |  |  |  |  |
| 28: Discuss end-of-life care with doctor |  | .67 |  |  |  |  |  |  |
| 27: Have funeral arrangements in order |  | .60 |  |  |  |  |  |  |
| 29: Location of death |  | .51 |  |  |  |  |  |  |
| 21: Say good-bye to loved ones |  | .47 |  |  |  |  |  |  |
| 31: State of consciousness in moment before death |  | .42 |  |  |  |  |  |  |
| 23: Have a spiritual service or ceremony |  |  | .98 |  |  |  |  |  |
| 22: Have visits from religious or spiritual advisor |  |  | .76 |  |  |  |  |  |
| 7: Unafraid of dying |  |  |  | .82 |  |  |  |  |
| 6: Feel at peace with dying |  |  |  | .79 |  |  |  |  |
| 25: Have means to end life |  |  |  |  | .67 |  |  |  |
| 14: Spend time with other family and friends |  |  |  |  |  | .38 |  |  |
| 15: Spend time alone |  |  |  |  |  | .38 |  |  |
| 30: Anyone present at moment of death |  |  |  |  |  |  | .48 |  |
| 18: Hugged by loved ones |  |  |  |  |  |  |  | -.52 |
| % variance explained | 18.45 | 6.07 | 4.80 | 3.44 | 3.15 | 2.07 | 1.89 | 1.65 |

*Note*. Only items with unique factor loadings > .35 are displayed.

B. Extracting 5 factors

| QODD items | Factor 1 | Factor 2 | Factor 3 | Factor 4 | Factor 5 |
| --- | --- | --- | --- | --- | --- |
| 3: Able to feed self | .77 |  |  |  |  |
| 4: Have control over bladder/bowels | .66 |  |  |  |  |
| 9: Have energy to do most things | .59 |  |  |  |  |
| 2: Have control over what was going on | .59 |  |  |  |  |
| 11: Keep dignity and self-respect | .46 |  |  |  |  |
| 1: Having pain under control | .43 |  |  |  |  |
| 8: Laugh and smile | .42 |  |  |  |  |
| 28: Discuss end-of-life care with doctor |  | .63 |  |  |  |
| 29: Location of death |  | .56 |  |  |  |
| 31: State of consciousness in moment before death |  | .52 |  |  |  |
| 24: Mechanical ventilator or kidney dialysis to prolong life |  | .52 |  |  |  |
| 27: Have funeral arrangements in order |  | .48 |  |  |  |
| 30: Anyone present at moment of death |  | .43 |  |  |  |
| 21: Say good-bye to loved ones |  | .42 |  |  |  |
| 23: Have a spiritual service or ceremony |  |  | .89 |  |  |
| 22: Have visits from religious or spiritual advisor |  |  | .81 |  |  |
| 6: Feel at peace with dying |  |  |  | .71 |  |
| 7: Unafraid of dying |  |  |  | .60 |  |
| 14: Spend time with other family and friends |  |  |  | .41 |  |
| 10: Worried about strain on loved ones |  |  |  | .40 |  |
| 25: Have means to end life |  |  |  |  | .57 |
| % variance explained | 18.23 | 5.85 | 4.64 | 3.20 | 2.81 |

*Note*. Only items with unique factor loadings > .35 are displayed.

C. Extracting 6 factors

| QODD items | Factor 1 | Factor 2 | Factor 3 | Factor 4 | Factor 5 | Factor 6 |
| --- | --- | --- | --- | --- | --- | --- |
| 3: Able to feed self | .74 |  |  |  |  |  |
| 4: Have control over bladder/bowels | .63 |  |  |  |  |  |
| 9: Have energy to do most things | .58 |  |  |  |  |  |
| 2: Have control over what was going on | .57 |  |  |  |  |  |
| 1: Having pain under control | .41 |  |  |  |  |  |
| 8: Laugh and smile | .40 |  |  |  |  |  |
| 28: Discuss end-of-life care with doctor |  | .59 |  |  |  |  |
| 27: Have funeral arrangements in order |  | .54 |  |  |  |  |
| 25: Have means to end life |  | .50 |  |  |  |  |
| 26: Clear up bad feelings |  | .49 |  |  |  |  |
| 29: Location of death |  | .44 |  |  |  |  |
| 24: Mechanical ventilator or kidney dialysis to prolong life |  | .38 |  |  |  |  |
| 23: Have a spiritual service or ceremony |  |  | .90 |  |  |  |
| 22: Have visits from religious or spiritual advisor |  |  | .81 |  |  |  |
| 6: Feel at peace with dying |  |  |  | .81 |  |  |
| 7: Unafraid of dying |  |  |  | .69 |  |  |
| 14: Spend time with other family and friends |  |  |  |  | .41 |  |
| 30: Anyone present at moment of death |  |  |  |  |  | .51 |
| % variance explained | 18.32 | 5.91 | 4.66 | 3.30 | 2.88 | 1.95 |

*Note*. Only items with unique factor loadings > .35 are displayed. QODD #11: keep dignity and self-respect cross-loaded onto Factors 1 (.54) and 5 (.37).
